# Supplementary material
Source: HighWire-hosted journal article supplement (https://www.cmaj.ca/highwire/filestream/69577/field_highwire_adjunct_files/0/170812-image-1-at_NEW.pdf)
Supplement: 170812-image-1-at_NEW.pdf [file 170812-image-1-at_NEW.pdf]

## Appendix 1 (as supplied by the authors): Histopathology

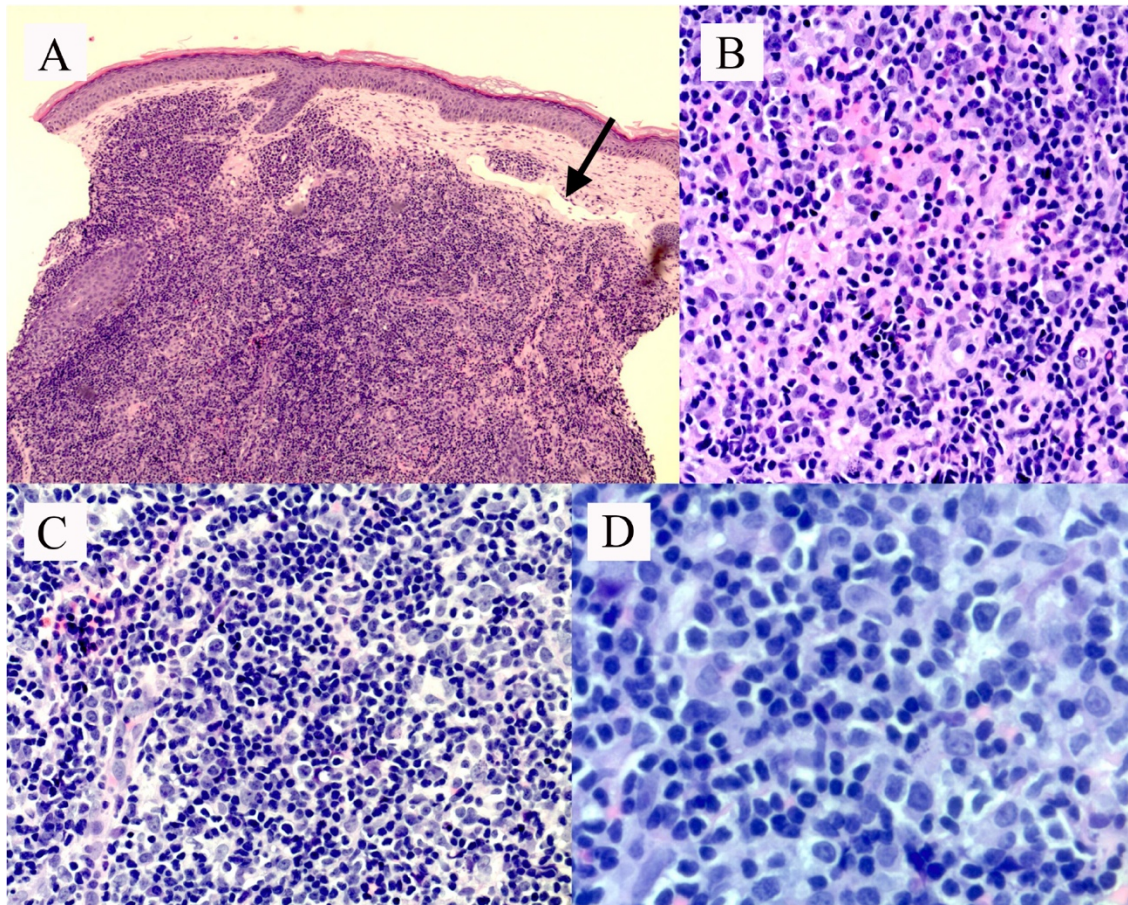

(A) Biopsy of the lesion showed a (B, C) diffuse polymorphous infiltrate of lymphocytes, histiocytes, plasma cells and a few eosinophils, which were separated from a normal appearing epidermis by a thin Grenz zone (black arrow). Hematoxylin and eosin stain. Original magnification (A)  $\times 100$ ; (B, C)  $\times 200$ . (D) Immunohistochemistry showed a mixed population of B and T cells. These combined features were consistent with a reactive process, and we made a final diagnosis of cutaneous lymphoid hyperplasia, or pseudolymphoma.
